# Supplementary material for: MALDI-TOF MS Limits for the Identification of Mediterranean Sandflies of the Subgenus Larroussius, with a Special Focus on the Phlebotomus perniciosus Complex
Source: MDPI journal article supplement (doi:10.3390/microorganisms10112135), 2022-10-28
Supplement: s1 [file s1]

Supplementary Table S1: Results of Reims and Marseille MSP database for identification

| Analyte | Species                      | Reims MSP database                      |      |                                         |      |                             | Marseille MSP database           |      |                                  |      |                             |
|---------|------------------------------|-----------------------------------------|------|-----------------------------------------|------|-----------------------------|----------------------------------|------|----------------------------------|------|-----------------------------|
|         |                              | First match                             | LSV1 | Second match                            | LSV2 | Species present in database | First match                      | LSV1 | Second match                     | LSV2 | Species present in database |
| AM_115  | <i>Sergentomyia minuta</i>   | <b>unreliable identification</b>        | 0.52 | <b>unreliable identification</b>        | 0.28 | No                          | <i>Sergentomyia minuta</i>       | 1.22 | <i>Sergentomyia minuta</i>       | 1.1  | Yes                         |
| AM_119  | <i>Ph. perniciosus</i> (PNA) | PT19 <i>Ph. perniciosus</i> female (PN) | 1.8  | MOF10 <i>Ph. perniciosus</i> male (PNA) | 1.47 | Yes                         | <i>Ph. perniciosus</i> male      | 1.26 | <i>Ph. perniciosus</i> male      | 1.23 | Yes                         |
| AM_131  | <i>Sergentomyia fallax</i>   | <b>unreliable identification</b>        | 0.74 | <b>unreliable identification</b>        | 0.51 | No                          | <i>Sergentomyia minuta</i>       | 1.13 | <i>Phlebotomus sergenti</i>      | 1.02 | Yes                         |
| AM_228  | <i>Ph. longicuspis</i>       | PT19 <i>Ph. perniciosus</i> female (PN) | 1.71 | ES08 <i>Ph. perniciosus</i> female (PN) | 1.21 | No                          | <i>Ph. perfiliewi</i>            | 1.09 | <i>Ph. perniciosus</i> female    | 1.06 | Yes                         |
| AM_229  | <i>Sergentomyia fallax</i>   | <b>unreliable identification</b>        | 0.41 | <b>unreliable identification</b>        | 0.31 | No                          | <i>Sergentomyia minuta</i>       | 1.01 | <b>unreliable identification</b> | 0.84 | No                          |
| AM_239  | <i>Ph. papatasi</i>          | <b>unreliable identification</b>        | 0.75 | <b>unreliable identification</b>        | 0.72 | Yes                         | <i>Ph. perniciosus</i> female    | 1.05 | <b>unreliable identification</b> | 0.99 | Yes                         |
| AM_243  | <i>Ph. longicuspis</i>       | PT19 <i>Ph. perniciosus</i> female (PN) | 1.72 | MOZ14 <i>Ph. longicuspis</i> female     | 1.61 | Yes                         | <i>Ph. longicuspis</i> female    | 1.5  | <i>Ph. longicuspis</i> male      | 1.48 | Yes                         |
| AM_245  | <i>Ph. longicuspis</i>       | PT19 <i>Ph. perniciosus</i> female (PN) | 1.63 | MOZ3 <i>Ph. longicuspis</i> female      | 1.58 | Yes                         | <i>Ph. longicuspis</i> female    | 1.49 | <i>Ph. longicuspis</i> male      | 1.38 | Yes                         |
| AM_332  | <i>Sergentomyia fallax</i>   | <b>unreliable identification</b>        | 0.82 | <b>unreliable identification</b>        | 0.25 | No                          | <i>Sergentomyia minuta</i>       | 1.07 | <b>unreliable identification</b> | 0.91 | No                          |
| AM_342  | <i>Ph. papatasi</i>          | ES41 <i>Ph. papatasi</i> (male)         | 1.36 | ES08 <i>Ph. perniciosus</i> female (PN) | 0.76 | Yes                         | <b>unreliable identification</b> | 0.89 | <b>unreliable identification</b> | 0.84 | Yes                         |
| AM_352  | <i>Ph. papatasi</i>          | ES41 <i>Ph. papatasi</i> (male)         | 1.72 | PT31 <i>Ph. perniciosus</i> male (PN)   | 1.14 | Yes                         | <i>Ph. perfiliewi</i>            | 1.05 | <i>Ph. perniciosus</i> male      | 1.03 | Yes                         |
| AM_380  | <i>Ph. perniciosus</i> (PNA) | PT19 <i>Ph. perniciosus</i> female (PN) | 1.62 | MOF10 <i>Ph. perniciosus</i> male (PNA) | 1.28 | Yes                         | <i>Ph. perniciosus</i> male      | 1.35 | <i>Ph. perniciosus</i> male      | 1.29 | Yes                         |

|        |                              |                                         |      |                                         |      |     |                                  |      |                                  |      |     |
|--------|------------------------------|-----------------------------------------|------|-----------------------------------------|------|-----|----------------------------------|------|----------------------------------|------|-----|
| AM_390 | <i>Sergentomyia minuta</i>   | <b>unreliable identification</b>        | 0.79 | <b>unreliable identification</b>        | 0.78 | No  | <i>Sergentomyia minuta</i>       | 1.46 | <i>Sergentomyia minuta</i>       | 1.02 | Yes |
| AM_433 | <i>Ph. sergenti</i>          | <b>unreliable identification</b>        | 0.75 | <b>unreliable identification</b>        | 0.74 | No  | <i>Ph. perniciosus female</i>    | 1.01 | <b>unreliable identification</b> | 0.94 | Yes |
| AM_434 | <i>Ph. sergenti</i>          | <b>unreliable identification</b>        | 0.88 | <b>unreliable identification</b>        | 0.8  | No  | <b>unreliable identification</b> | 0.9  | <b>unreliable identification</b> | 0.85 | Yes |
| AM_536 | <i>Ph. sergenti</i>          | <b>unreliable identification</b>        | 0.93 | <b>unreliable identification</b>        | 0.71 | No  | <b>unreliable identification</b> | 0.91 | <b>unreliable identification</b> | 0.84 | Yes |
| AM_586 | <i>Ph. perniciosus (PNA)</i> | PT19 <i>Ph. perniciosus</i> female (PN) | 1.75 | MT06 <i>Ph. perniciosus</i> female (PN) | 1.38 | Yes | <i>Ph. perniciosus male</i>      | 1.32 | <i>Ph. perniciosus male</i>      | 1.18 | Yes |
| AM_622 | <i>Sergentomyia minuta</i>   | <b>unreliable identification</b>        | 0.78 | <b>unreliable identification</b>        | 0.67 | No  | <i>Ph. tobbi</i>                 | 1.03 | <i>Ph. perfiliewi</i>            | 1.02 | Yes |

Supplementary Table S2. Characteristic of specimen included in this study.

| Species number | Species                | Country | Collection sites                                    | Collection date     | Sex    | Note     | Genebank accession number |
|----------------|------------------------|---------|-----------------------------------------------------|---------------------|--------|----------|---------------------------|
| MOF8           | <i>Ph. perniciosus</i> | Morocco | Chefchaouene (Loubar)                               | July 23rd, 1995     | male   | atypical | OP617463                  |
| MOF10          |                        |         |                                                     |                     | male   | atypical | OP617464                  |
| MOF24          |                        |         |                                                     |                     | female |          | OP617465                  |
| MARSI19        |                        |         | Ghamate (Sidi Bouyahya)                             | July 14th, 2005     | male   | atypical | OP617466                  |
| MARSI21        |                        |         |                                                     |                     | male   | atypical | OP617467                  |
| MARSI34        |                        |         |                                                     |                     | male   | atypical | OP617468                  |
| MARSI35        |                        |         |                                                     |                     | male   | atypical | OP617469                  |
| MARSI41        |                        |         |                                                     |                     | male   | atypical | OP617470                  |
| MARSI46        |                        |         |                                                     |                     | male   | atypical | OP617471                  |
| IT07           |                        | Italy   | Gargano (Monte San Angelo)                          | September 3rd, 1991 | male   |          | OP617472                  |
| IT11           |                        |         |                                                     |                     | male   |          | OP617473                  |
| IT14           |                        |         |                                                     |                     | male   |          | OP617474                  |
| IT22           |                        |         |                                                     |                     | male   |          | OP617475                  |
| IT24           |                        |         |                                                     |                     | male   |          | OP617476                  |
| IT08           |                        |         |                                                     |                     | female |          | OP617477                  |
| IT12           |                        |         |                                                     |                     | female |          | OP617478                  |
| IT13           |                        |         |                                                     |                     | female |          | OP617479                  |
| FR35           |                        | France  | Touraine (Beauvallon)                               | July 28th, 2002     | male   |          | OP617480                  |
| FR47           |                        |         |                                                     | July 25th, 2007     | male   |          | OP617481                  |
| FR48           |                        |         |                                                     |                     | male   |          | OP617482                  |
| FR50           |                        |         |                                                     |                     | male   |          | OP617483                  |
| ES07           |                        | Spain   | Catalonia (Begues)<br>Saragossa (El Bourgo de_Ebro) | August 19th, 1999   | female |          | OP617484                  |
| ES12           |                        |         |                                                     | August 13th, 1997   | male   |          | OP617485                  |
| ES13           |                        |         |                                                     |                     | male   |          | OP617486                  |
| ES15           |                        |         |                                                     |                     | male   |          | OP617487                  |
| ES16           |                        |         |                                                     |                     | male   |          | OP617488                  |
| ES08           |                        |         |                                                     |                     | female |          | OP617489                  |
| ES09           |                        |         |                                                     |                     | female |          | OP617490                  |

|      |          |                      |                  |        |          |
|------|----------|----------------------|------------------|--------|----------|
| ES18 |          |                      |                  | female | OP617491 |
| ES19 |          |                      |                  | female | OP617492 |
| ES25 |          | Murcia (Verdolay)    | August 8th, 1997 | male   | OP617493 |
| ES29 |          |                      |                  | male   | OP617494 |
| ES31 |          |                      |                  | male   | OP617495 |
| ES30 |          |                      |                  | female | OP617496 |
| ES37 |          | Andalusia (Turre)    | July 29th, 1997  | male   | OP617497 |
| ES39 |          |                      |                  | male   | OP617498 |
| ES43 |          |                      |                  | male   | OP617499 |
| ES45 |          |                      |                  | male   | OP617500 |
| PT08 | Portugal | Algarve (Bordeira)   | July 9th, 1996   | male   | OP617501 |
| PT09 |          |                      |                  | male   | OP617502 |
| PT13 |          |                      |                  | male   | OP617503 |
| PT01 |          |                      |                  | female | OP617504 |
| PT03 |          |                      |                  | female | OP617505 |
| PT04 |          |                      |                  | female | OP617506 |
| PT05 |          |                      |                  | female | OP617507 |
| PT07 |          |                      |                  | female | OP617508 |
| PT19 |          |                      |                  | female | OP617509 |
| PT20 |          |                      |                  | female | OP617510 |
| PT31 |          | Alto Douro (Cheires) | July 25th, 1996  | male   | OP617511 |
| PT33 |          |                      |                  | male   | OP617512 |
| PT29 |          |                      |                  | female | OP617513 |
| MT01 | Malta    | Gozo (Zebbug)        | July 20th, 1989  | male   | OP617514 |
| MT02 |          |                      |                  | male   | OP617515 |
| MT10 |          |                      |                  | male   | OP617516 |
| MT11 |          |                      |                  | male   | OP617517 |
| MT12 |          |                      |                  | male   | OP617518 |
| MT13 |          |                      |                  | male   | OP617519 |
| MT24 |          |                      |                  | male   | OP617520 |
| MT04 |          |                      |                  | female | OP617521 |
| MT05 |          |                      |                  | female | OP617522 |
| MT06 |          |                      |                  | female | OP617523 |
| MT07 |          |                      |                  | female | OP617524 |

|          |                        |          |                            |                     |        |                |          |
|----------|------------------------|----------|----------------------------|---------------------|--------|----------------|----------|
| MT23     |                        |          |                            |                     | female |                | OP617538 |
| IT09     | <i>Ph. neglectus</i>   | Italy    | Gargano (Monte San Angelo) | September 3rd, 1991 | male   |                | OP617525 |
| IT15     |                        |          |                            |                     | male   |                | OP617526 |
| IT18     |                        |          |                            |                     | male   |                | OP617527 |
| IT21     |                        |          |                            |                     | male   |                | OP617528 |
| ES06     | <i>Ph. ariasi</i>      | Spain    | Catalonia (Begues)         | August 19, 1999     | female |                | OP617529 |
| ES26     |                        |          | Murcia (Verdolay)          | August 8th, 1997    | female |                | OP617530 |
| PT02     |                        | Portugal | Algarve (Bordeira)         | July 9th, 1996      | female |                | OP617531 |
| PT24     |                        |          | Alto Douro (Cheires)       | July 25th, 1996     | female |                | OP617532 |
| PT25     |                        |          |                            |                     | female |                | OP617533 |
| PT37     |                        |          |                            |                     | female |                | OP617534 |
| FR43     |                        | France   | Dordogne (Vaunac)          | July 25th, 2007     | male   |                | OP617535 |
| FR44     |                        |          |                            |                     | male   |                | OP617536 |
| MT09     | <i>Ph. perfiliewi</i>  | Malta    | Gozo (Zebbug)              | July 20th, 1989     | male   |                | OP617537 |
| FR49     | <i>Ph. mascittii</i>   | France   | Dordogne (Vaunac)          | 25-Jul-2007         | female |                | OP617539 |
| FR51     |                        |          | Dordogne (Vaunac)          |                     | female |                | OP617540 |
| FR59     |                        |          | Franché-Comté (Seillières) | July 22nd, 2003     | female |                | OP617541 |
| ES40     | <i>Ph. papatasi</i>    | Spain    | Andalusia (Turre)          | July 29th, 1997     | male   |                | OP617542 |
| ES41     |                        |          |                            |                     | male   |                | OP617543 |
| MT08     | <i>Ph. similis</i>     | Malta    | Gozo (Zebbug)              | July 20th, 1988     | female |                | OP617544 |
| MARTAO02 | <i>Ph. longicuspis</i> | Morocco  | Taounate                   | July 19th, 1995     | male   | lcus_haplotype | OP617545 |
| MARTAO04 |                        |          |                            |                     | male   | lcus_haplotype | OP617546 |
| MARTAO06 |                        |          |                            |                     | male   | lcus_haplotype | OP617547 |
| MOZ13    |                        |          | Ouezzana (Kchila)          | July 23rd, 1995     | female | lcus_haplotype | OP617548 |
| MOZ14    |                        |          |                            |                     | female | lcus_haplotype | OP617549 |
| MARTAO10 |                        |          | Taounate (Aïcha)           | July 19th, 1995     | male   | lcx_haplotype  | OP617550 |
| MOZ02    |                        |          | Ouezzana (Kchila)          | July 23rd, 1995     | female | lcx_haplotype  | OP617551 |
| MOZ03    |                        |          | Ouezzana (Kchila)          | July 23rd, 1995     | female | lcx_haplotype  | OP617552 |
| MOF22    |                        |          | Chefchaouene (Loubar)      | July 23rd, 1995     | female | lcx_haplotype  | OP617553 |
